# Supplementary material for: Development of a miRNA-seq based prognostic signature in lung adenocarcinoma
Source: PubMed Central journal article supplement (PMC6325795; doi:10.1186/s12885-018-5206-8), 2019-01-08
Supplement: 12885_2018_5206_MOESM1_ESM.pdf [file 12885_2018_5206_MOESM1_ESM.pdf]

# Supplementary Material

| KEGG pathway                                             | p-value  | Number of Genes |
|----------------------------------------------------------|----------|-----------------|
| Proteoglycans in cancer                                  | <0.00001 | 61              |
| Hippo signaling pathway                                  | <0.00001 | 43              |
| Protein processing in endoplasmic reticulum              | <0.00001 | 52              |
| Glioma                                                   | <0.00001 | 24              |
| Lysine degradation                                       | <0.00001 | 15              |
| Adherens junction                                        | <0.00001 | 25              |
| Prostate cancer                                          | 0.00011  | 34              |
| Renal cell carcinoma                                     | 0.00022  | 24              |
| Pathways in cancer                                       | 0.00032  | 93              |
| Transcriptional misregulation in cancer                  | 0.00035  | 46              |
| FoxO signaling pathway                                   | 0.00044  | 41              |
| RNA transport                                            | 0.00062  | 48              |
| Colorectal cancer                                        | 0.00062  | 22              |
| Pancreatic cancer                                        | 0.00100  | 24              |
| Hepatitis B                                              | 0.00100  | 42              |
| Viral carcinogenesis                                     | 0.00100  | 50              |
| p53 signaling pathway                                    | 0.00158  | 23              |
| Bacterial invasion of epithelial cells                   | 0.00171  | 21              |
| mRNA surveillance pathway                                | 0.00238  | 29              |
| ErbB signaling pathway                                   | 0.00509  | 24              |
| Bladder cancer                                           | 0.00509  | 16              |
| Endocytosis                                              | 0.00533  | 49              |
| Estrogen signaling pathway                               | 0.00551  | 29              |
| Choline metabolism in cancer                             | 0.00864  | 32              |
| Shigellosis                                              | 0.01418  | 19              |
| Focal adhesion                                           | 0.01469  | 52              |
| Small cell lung cancer                                   | 0.01604  | 25              |
| Thyroid hormone signaling pathway                        | 0.01617  | 33              |
| Non-small cell lung cancer                               | 0.01617  | 16              |
| mTOR signaling pathway                                   | 0.01698  | 19              |
| Salmonella infection                                     | 0.01698  | 24              |
| PI3K-Akt signaling pathway                               | 0.01957  | 76              |
| Wnt signaling pathway                                    | 0.02192  | 32              |
| Insulin signaling pathway                                | 0.02287  | 37              |
| Prolactin signaling pathway                              | 0.02917  | 20              |
| Central carbon metabolism in cancer                      | 0.03016  | 19              |
| HIF-1 signaling pathway                                  | 0.03100  | 29              |
| Type II diabetes mellitus                                | 0.03128  | 15              |
| RNA degradation                                          | 0.03765  | 23              |
| Chronic myeloid leukemia                                 | 0.04013  | 21              |
| Neurotrophin signaling pathway                           | 0.04126  | 33              |
| Signaling pathways regulating pluripotency of stem cells | 0.04285  | 36              |
| Pathogenic Escherichia coli infection                    | 0.04285  | 17              |

Table S1: A list of KEGG pathways found as significantly associated with five miRNAs: miR-375, miR-582-3p, miR-326, miR-181c-5p, and miR-99a-5p. The analysis was performed using DIANA-miRPath v3.0 [18].

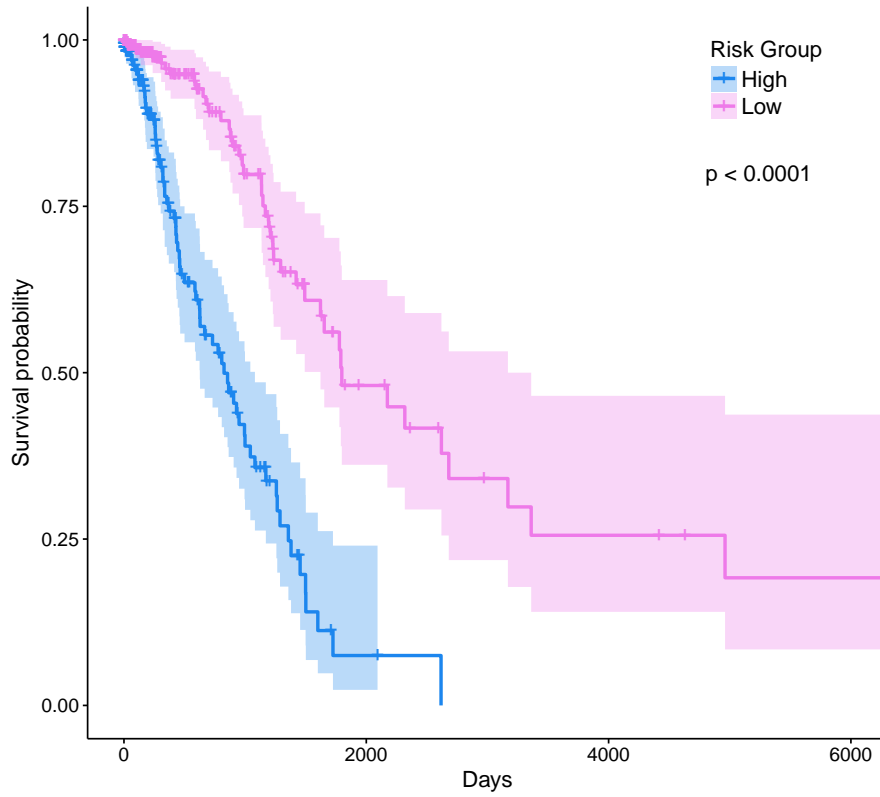

Figure S1: Estimated survival curves for high and low risk groups based on the entire dataset (i.e., combining both Model and Test sets). The p-value provided correspond to the log-rank test. The colored region represents the 95% point-wise CIs.

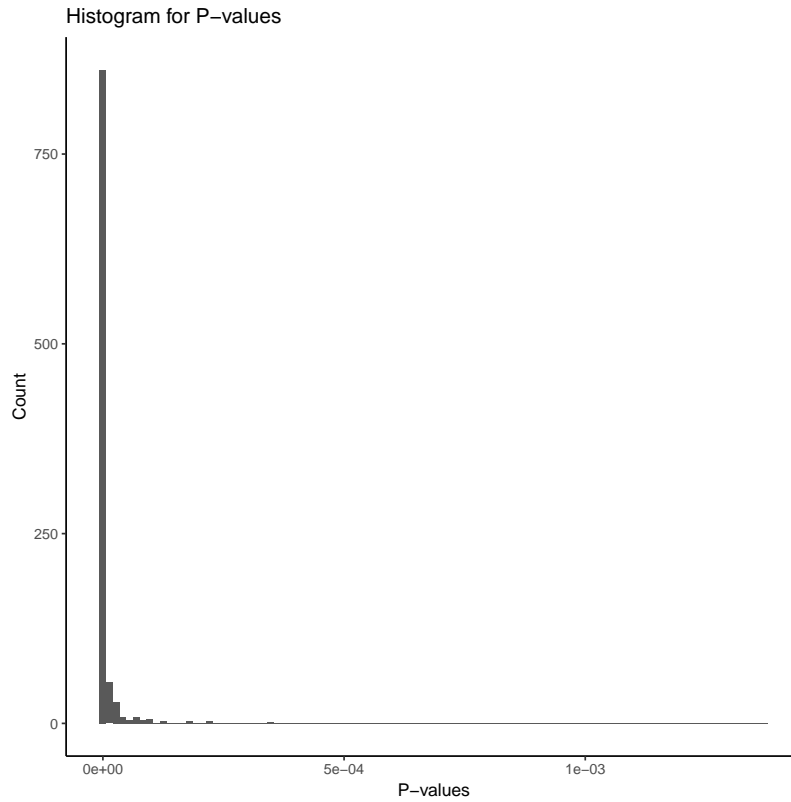

Figure S2: A histogram produced for the distribution of p-values that were calculated for the likelihood ratio test, which compares the Cox regression model that contained only cancer stage and age effects versus the model contained the effects of five miRNAs (miR-375, miR-562-3p, miR-326, miR-181-5p, and miR-99a-5p), in addition to cancer stage, and age. P-values were obtained using 1000 randomly selected folds of size  $n = 320$  of the original data.

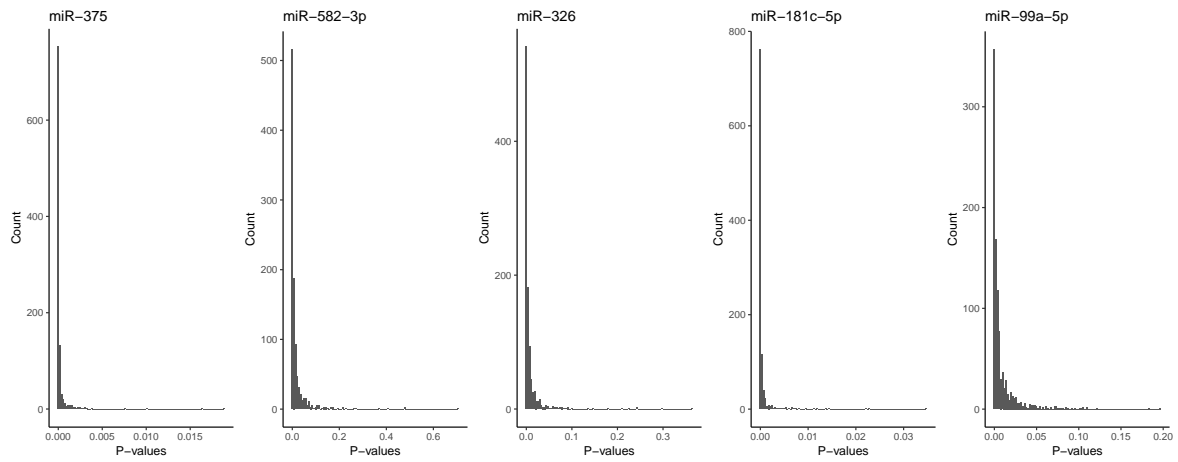

Figure S3: Histograms produced for distributions of p-values that were calculated for the likelihood ratio test, which compares the Cox regression model that contained only cancer stage and age effects versus models contained effects of the each five individual miRNAs (miR-375, miR-562-3p, miR-326, miR-181-5p, and miR-99a-5p), in addition to cancer stage, and age. P-values were obtained using 1000 randomly selected folds of size  $n = 320$  of the original data.
